# Supplementary material for: Bisucaberin B, a Linear Hydroxamate Class Siderophore from the Marine Bacterium Tenacibaculum mesophilum
Source: PubMed Central journal article supplement (PMC6270104; doi:10.3390/molecules18043917), 2013-04-02

# Supporting Information

**Figure S1.**  $^1\text{H-NMR}$  spectrum of bisucaberin B (1) in  $\text{CD}_3\text{OD} + \text{DMSO } d-6$  (1:1).

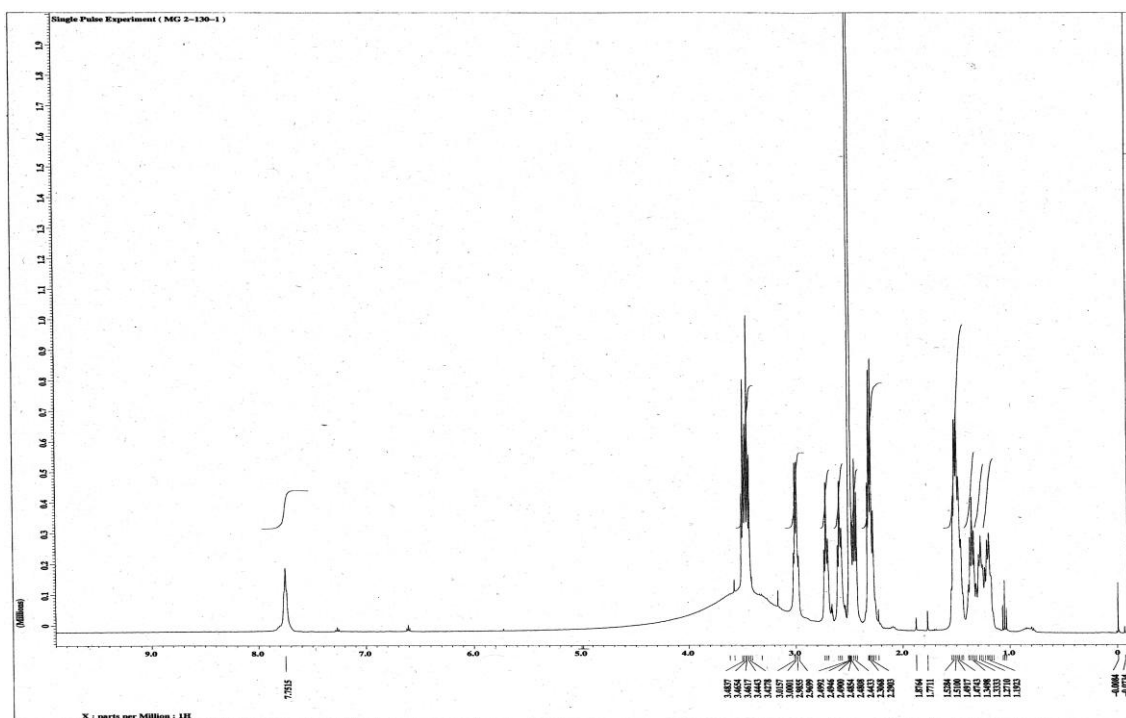

**Figure S2.**  $^1\text{H-NMR}$  spectrum of bisucaberin (2) in  $\text{CD}_3\text{OD} + \text{DMSO } d-6$  (1:1).

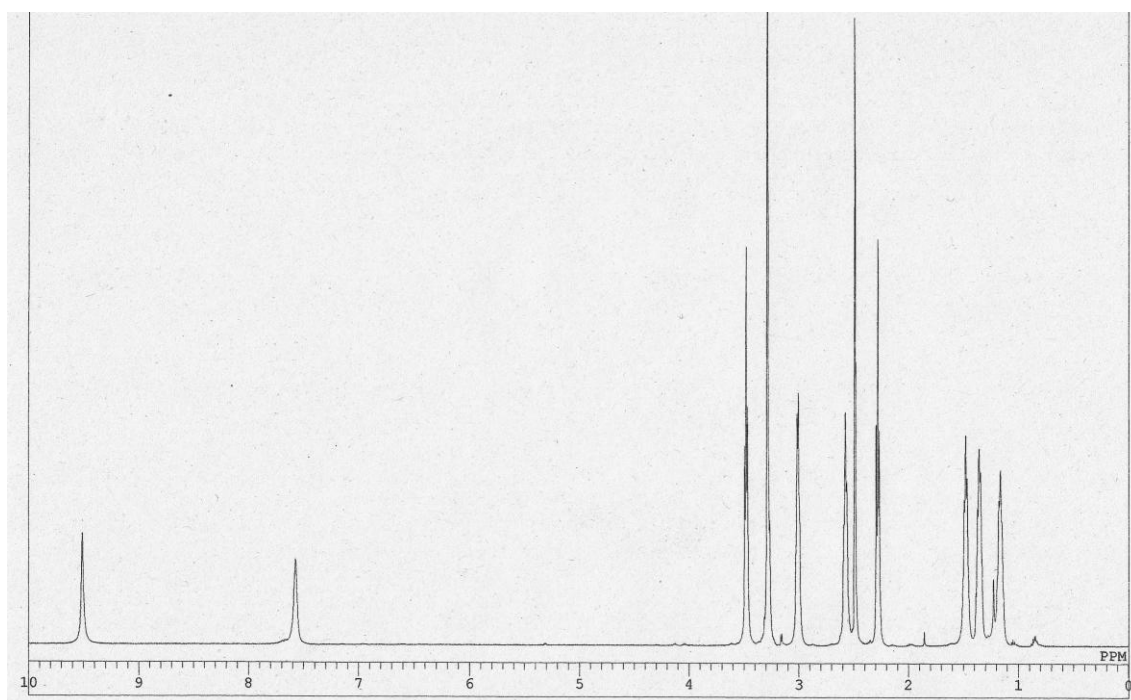

**Figure S3.**  $^{13}\text{C}$ -NMR spectrum of bisucaberin B (1) in  $\text{CD}_3\text{OD} + \text{DMSO } d\text{-6}$  (1:1).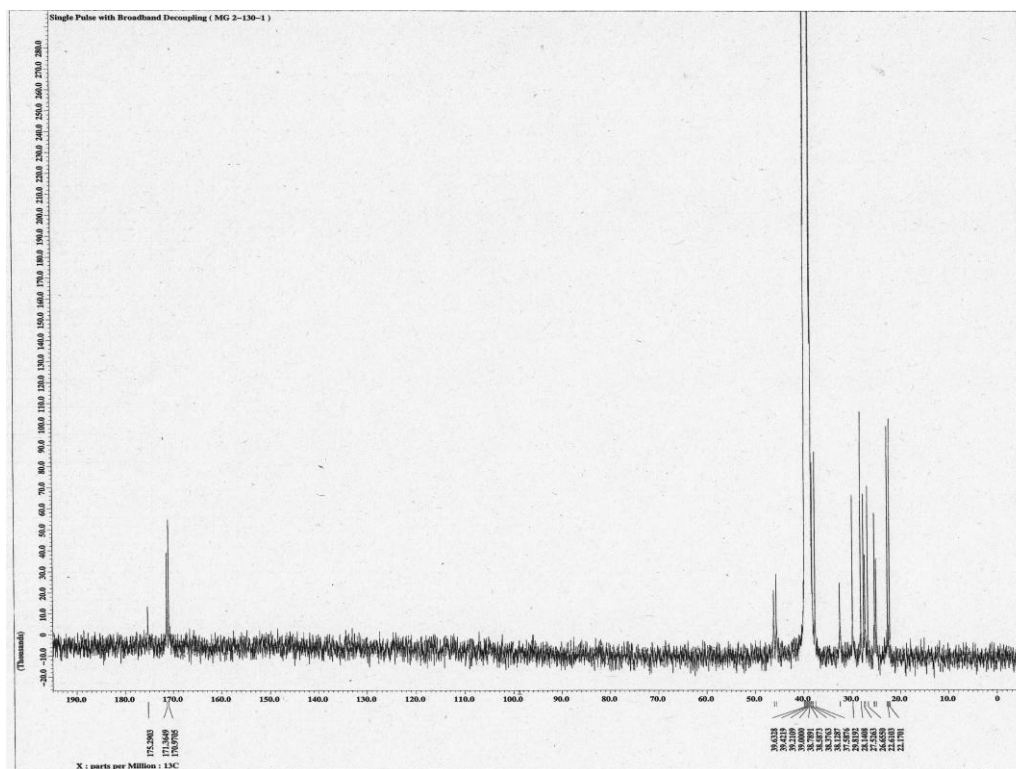**Figure S4.** COSY spectrum of bisucaberin B (1) in  $\text{CD}_3\text{OD} + \text{DMSO } d\text{-6}$  (1:1).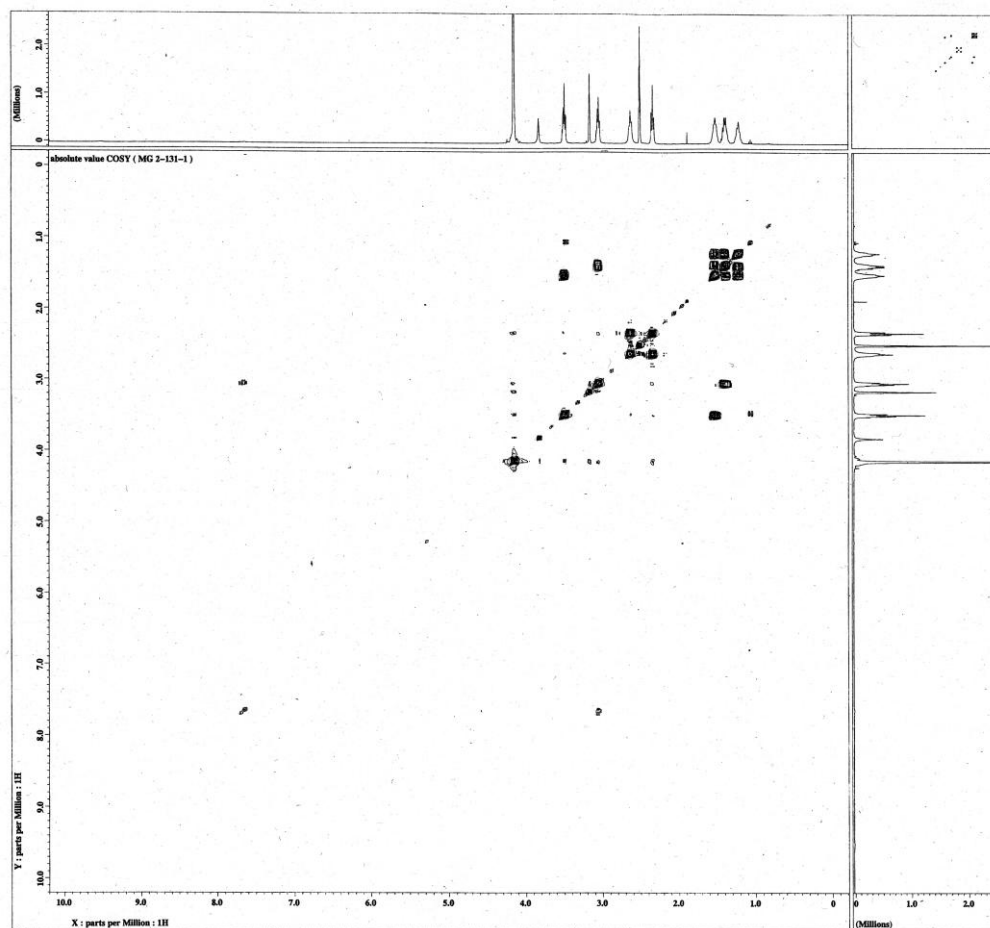

**Figure S5.** ROESY spectrum of bisucaberin B (1) in CD<sub>3</sub>OD + DMSO *d*-6 (1:1).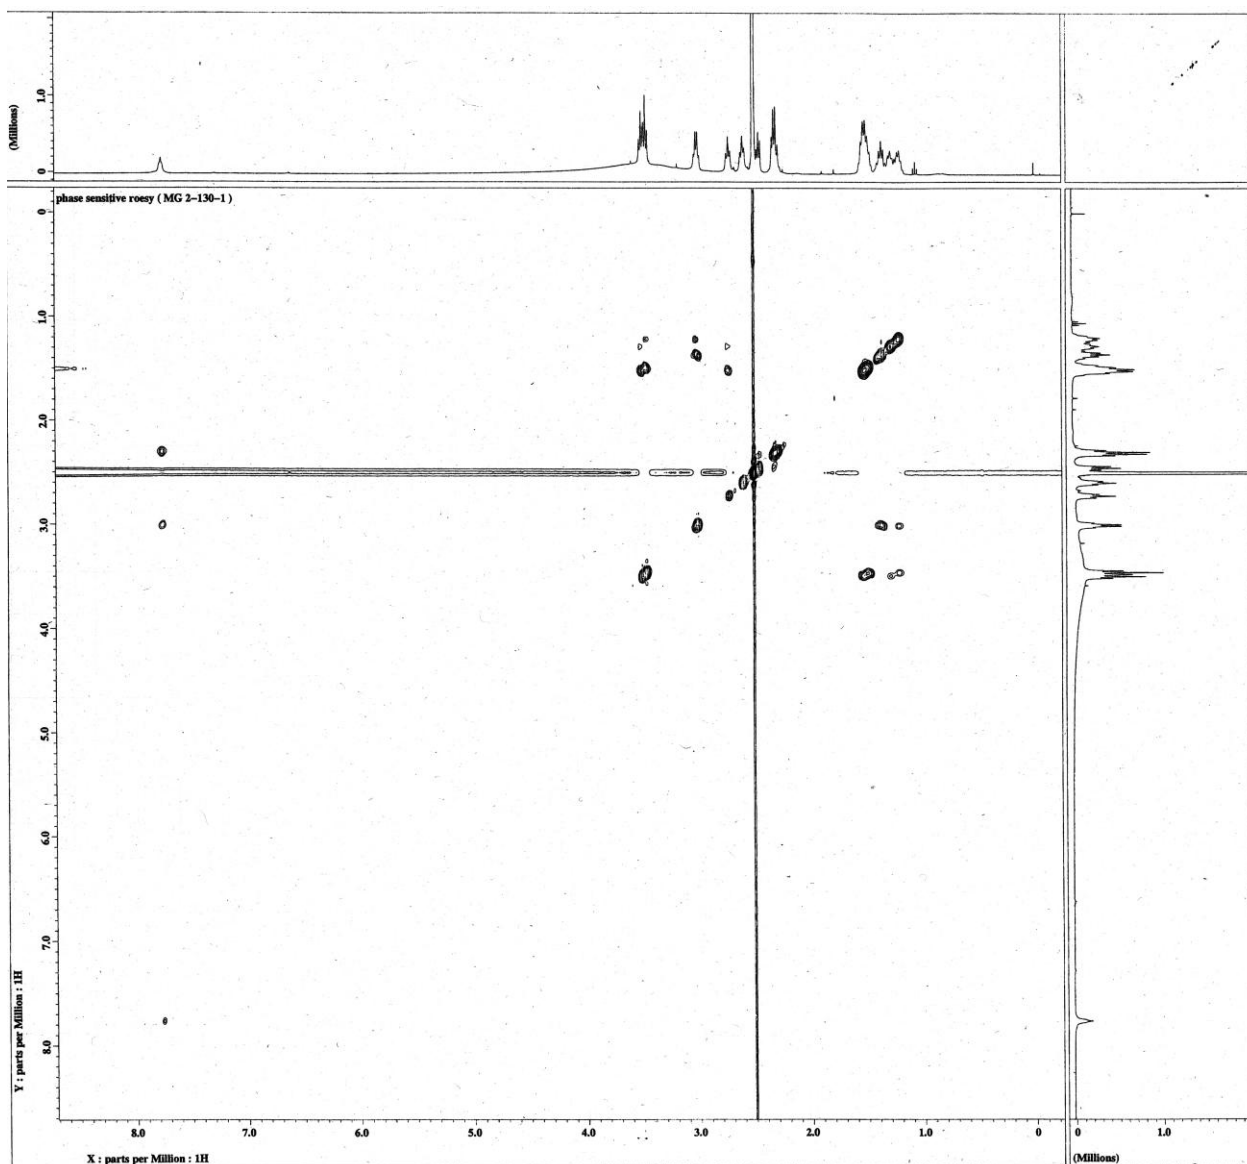

**Figure S6.** HMQC spectrum of bisucaberin B (1) in CD<sub>3</sub>OD + DMSO *d*-6 (1:1).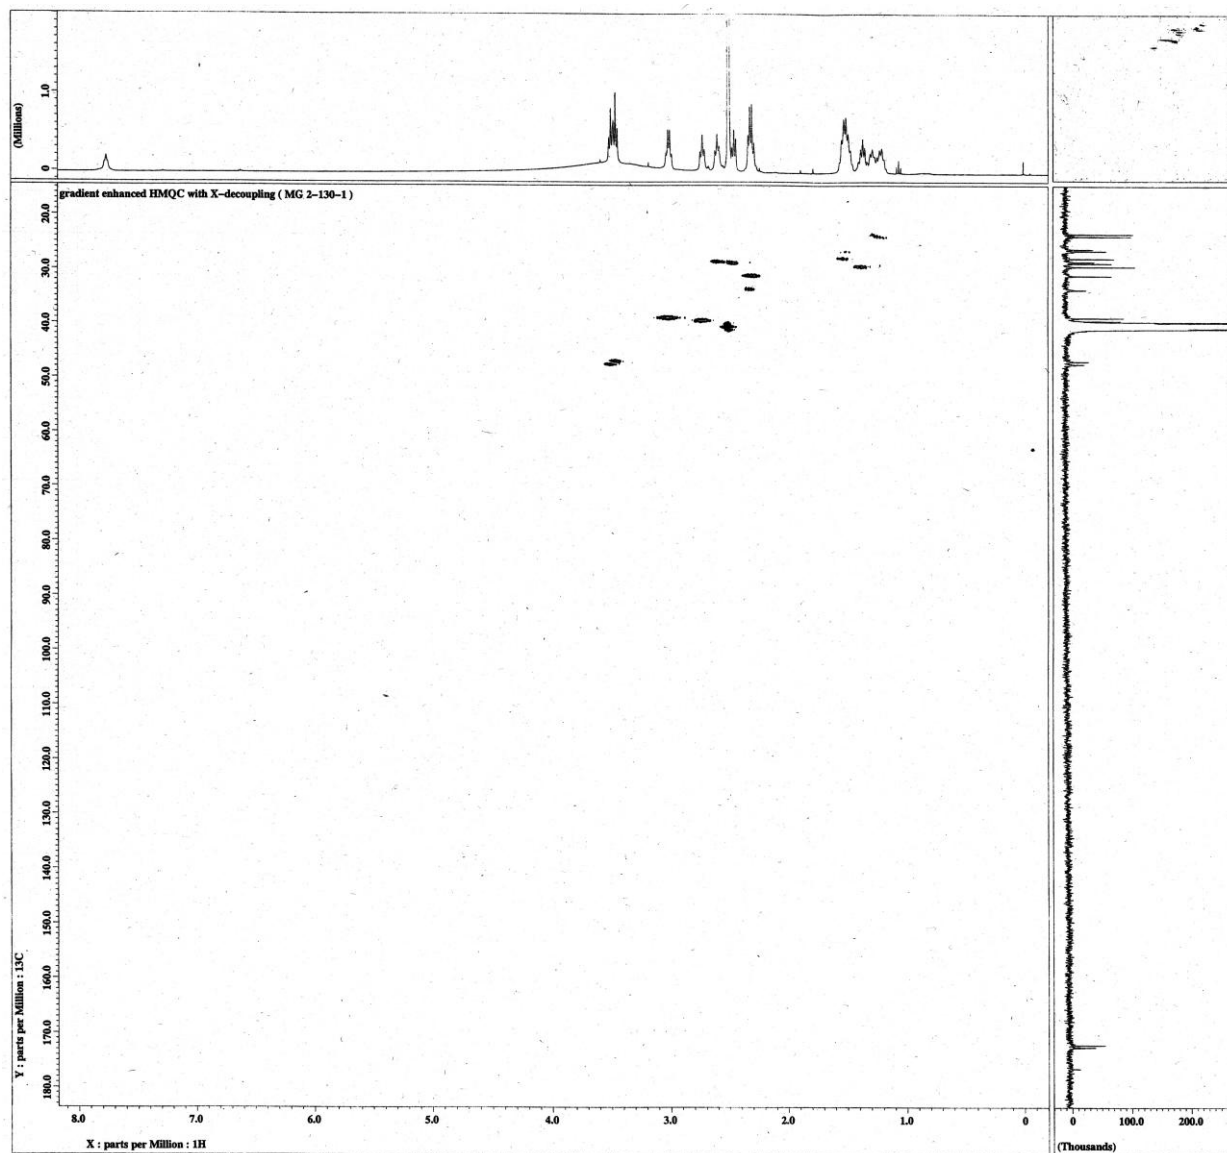

**Figure S7.** HMBC spectrum of bisucaberin B (1) in CD<sub>3</sub>OD + DMSO *d*-6 (1:1).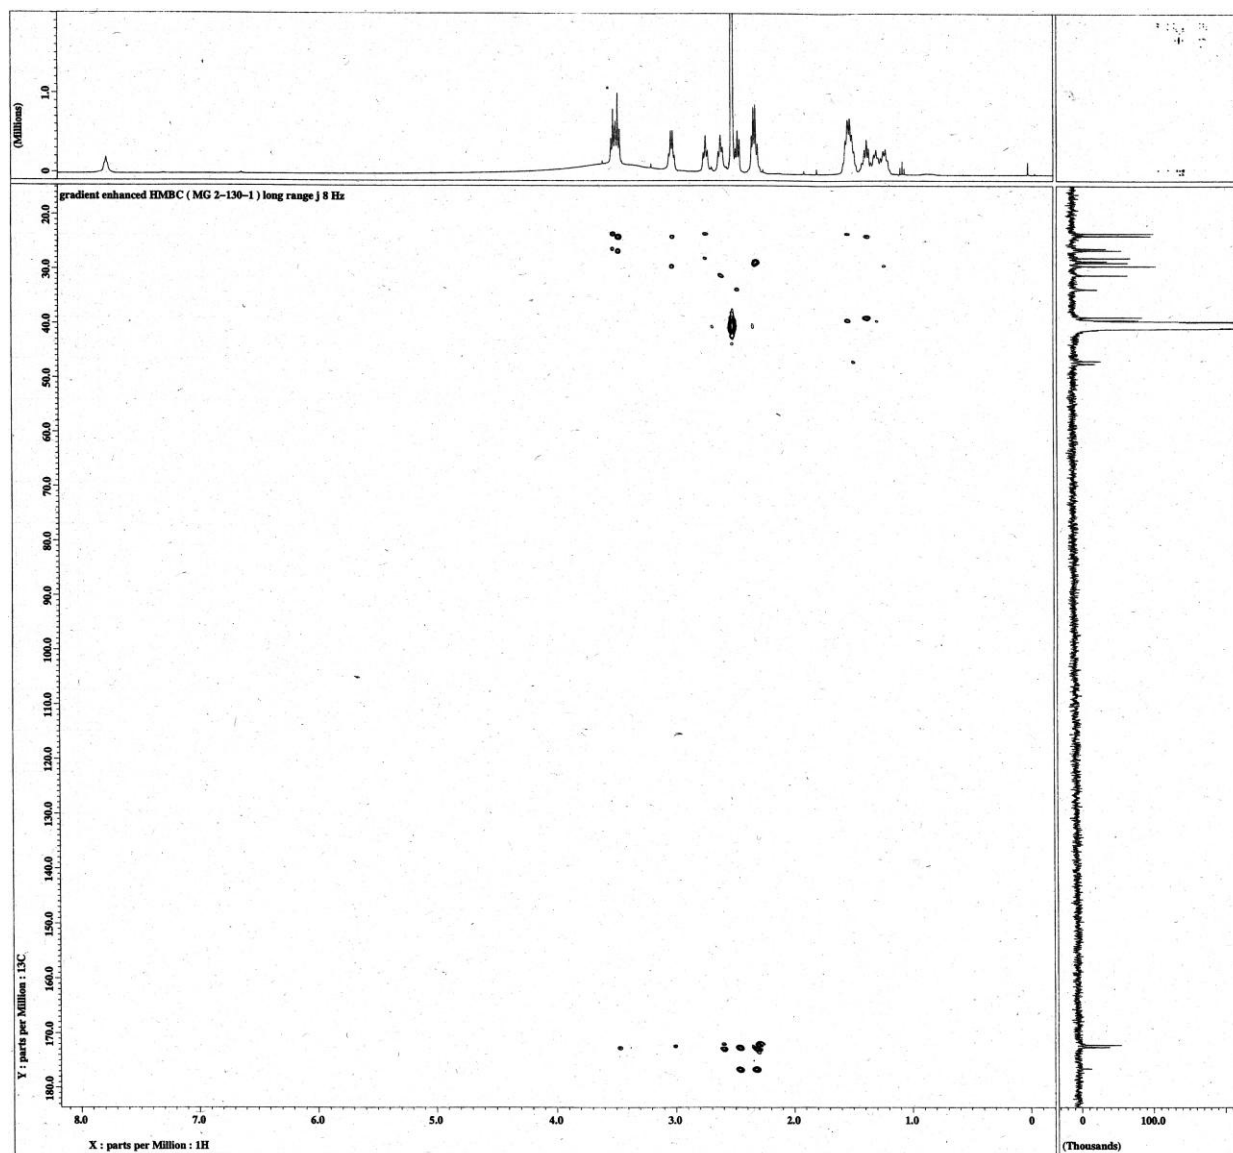

**Figure S8.** Low-Resolution positive (upper) and negative (lower) mode ESI mass spectra of bisucaberin B (**1**).

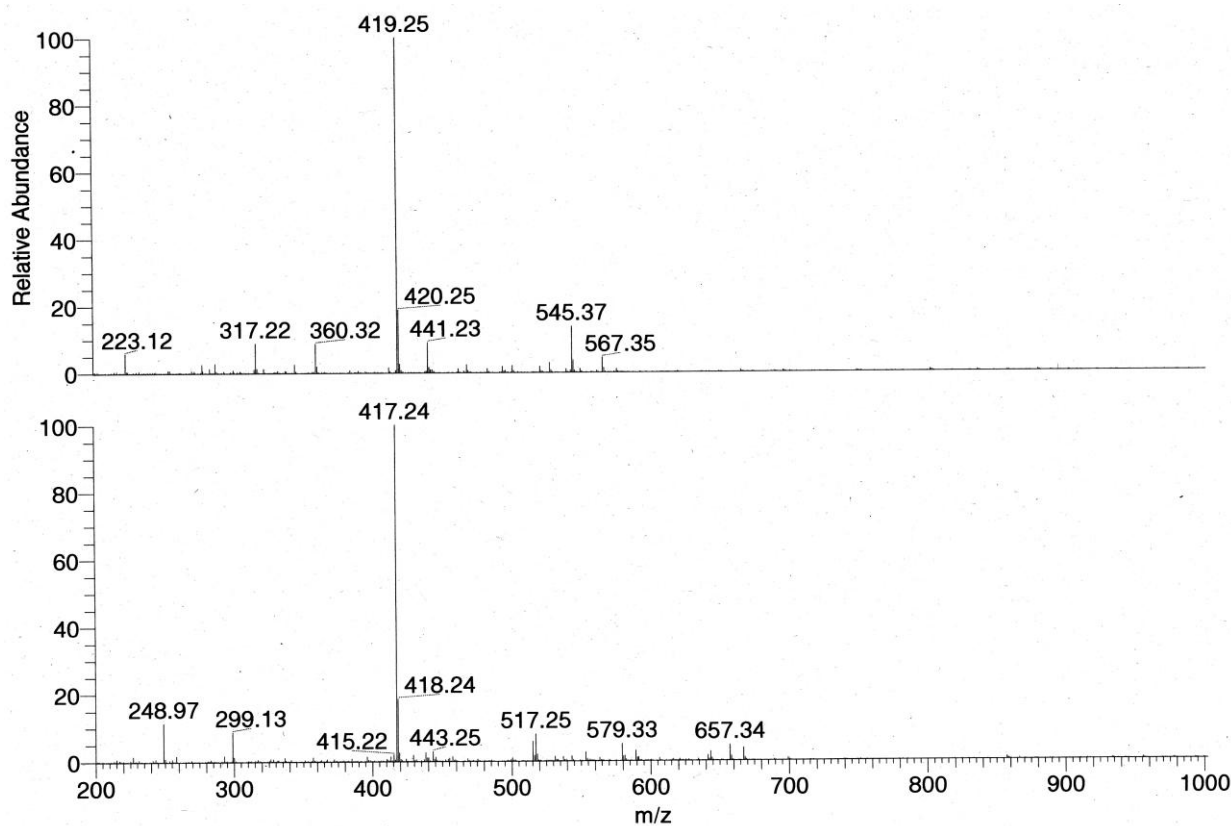

**Figure S9.** Positive-mode MALDI-TOF mass spectrum of bisucaberin B methylester.

Sample No. : C:\Xcalibur\...121824\_MG2\_130\_1\_pn2 Instrument : Exactive Mobile phase solvent : MeOH  
Operator name : rahul upadhye Sample solvent : MeOH  
Date : 11/6/2012 12:03:14 PM  
Instrumental method : C:\Xcalibur\methods\HESI\_100ul\pn\_L55\_S15.meth  
Instrumental Analysis Division, Equipment Management Center, Creative Research Institution, Hokkaido University

121824\_MG2\_130\_1\_pn2 #13-16 RT: 0.19-0.22 AV: 2 NL: 1.16E7  
T: FTMS (1,1) + p ESI Full ms [150.00-2000.00]

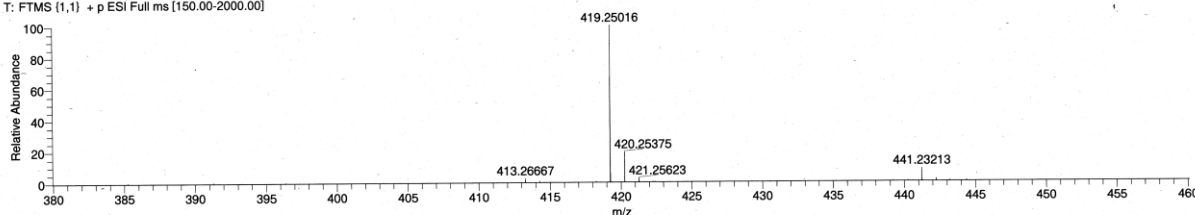

121824\_MG2\_130\_1\_pn2 #17-19 RT: 0.24-0.27 AV: 2 NL: 9.97E6  
T: FTMS (1,1) + p ESI Full ms [150.00-2000.00]

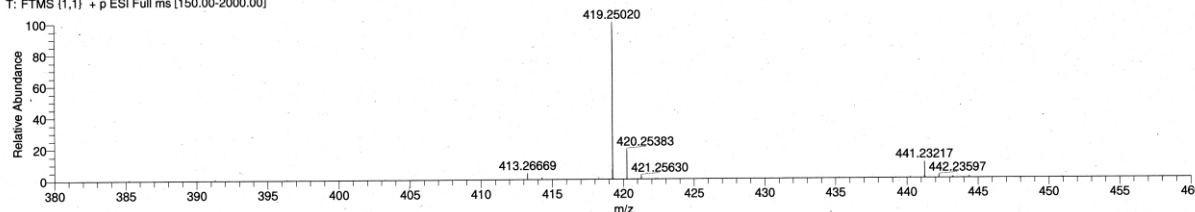

121824\_MG2\_130\_1\_pn2 #20-23 RT: 0.30-0.33 AV: 2 NL: 5.44E6  
T: FTMS (1,1) + p ESI Full ms [150.00-2000.00]

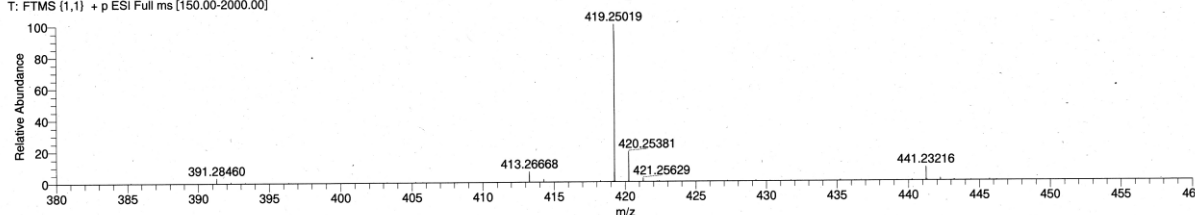

Figure S10. High-Resolution ESI mass spectra of bisucaberin B (1).

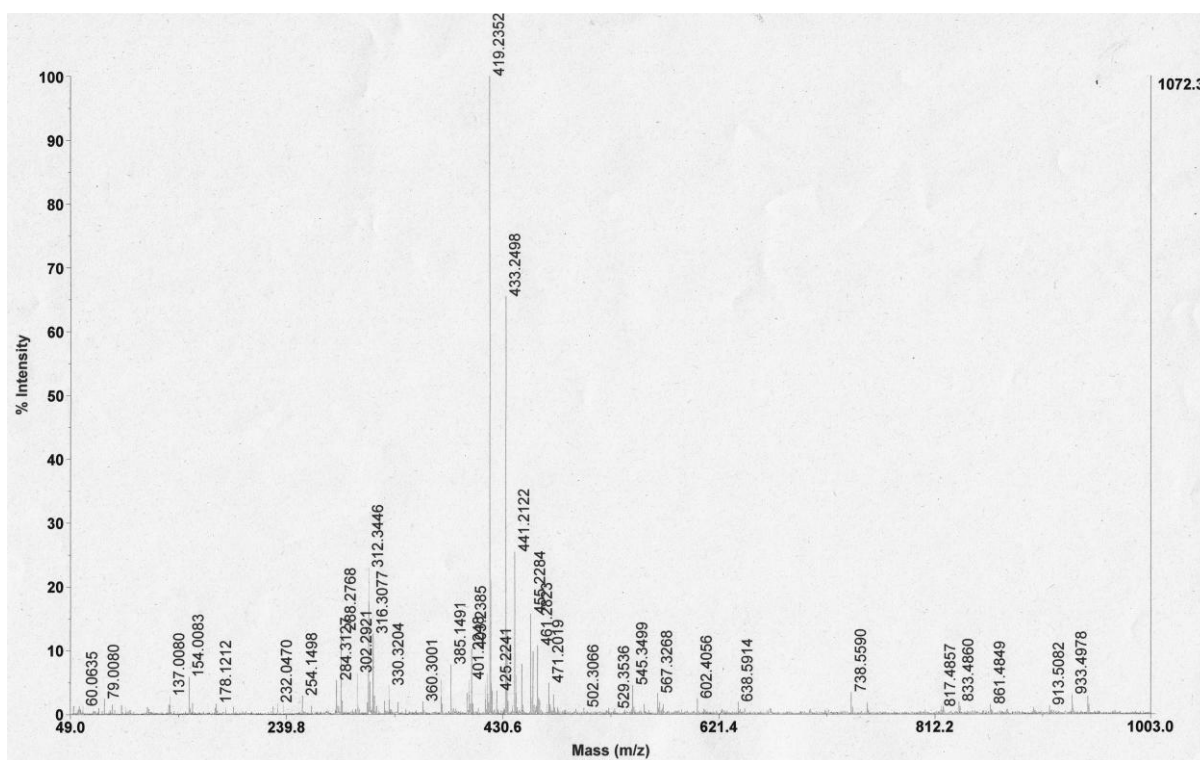

Supplement: molecules-18-03917-s001.pdf [file molecules-18-03917-s001.pdf]
